# Supplementary material for: Decreased Expression of TRPV4 Channels in HEI-OC1 Cells Induced by High Glucose Is Associated with Hearing Impairment
Source: PubMed Central journal article supplement — Yonsei Med J. 2018 Oct 15;59(9):1131–7. doi: 10.3349/ymj.2018.59.9.1131 (PMC6192885; doi:10.3349/ymj.2018.59.9.1131), 2018-10-15
Supplement: ymj-59-1131-s001.pdf [file ymj-59-1131-s001.pdf]

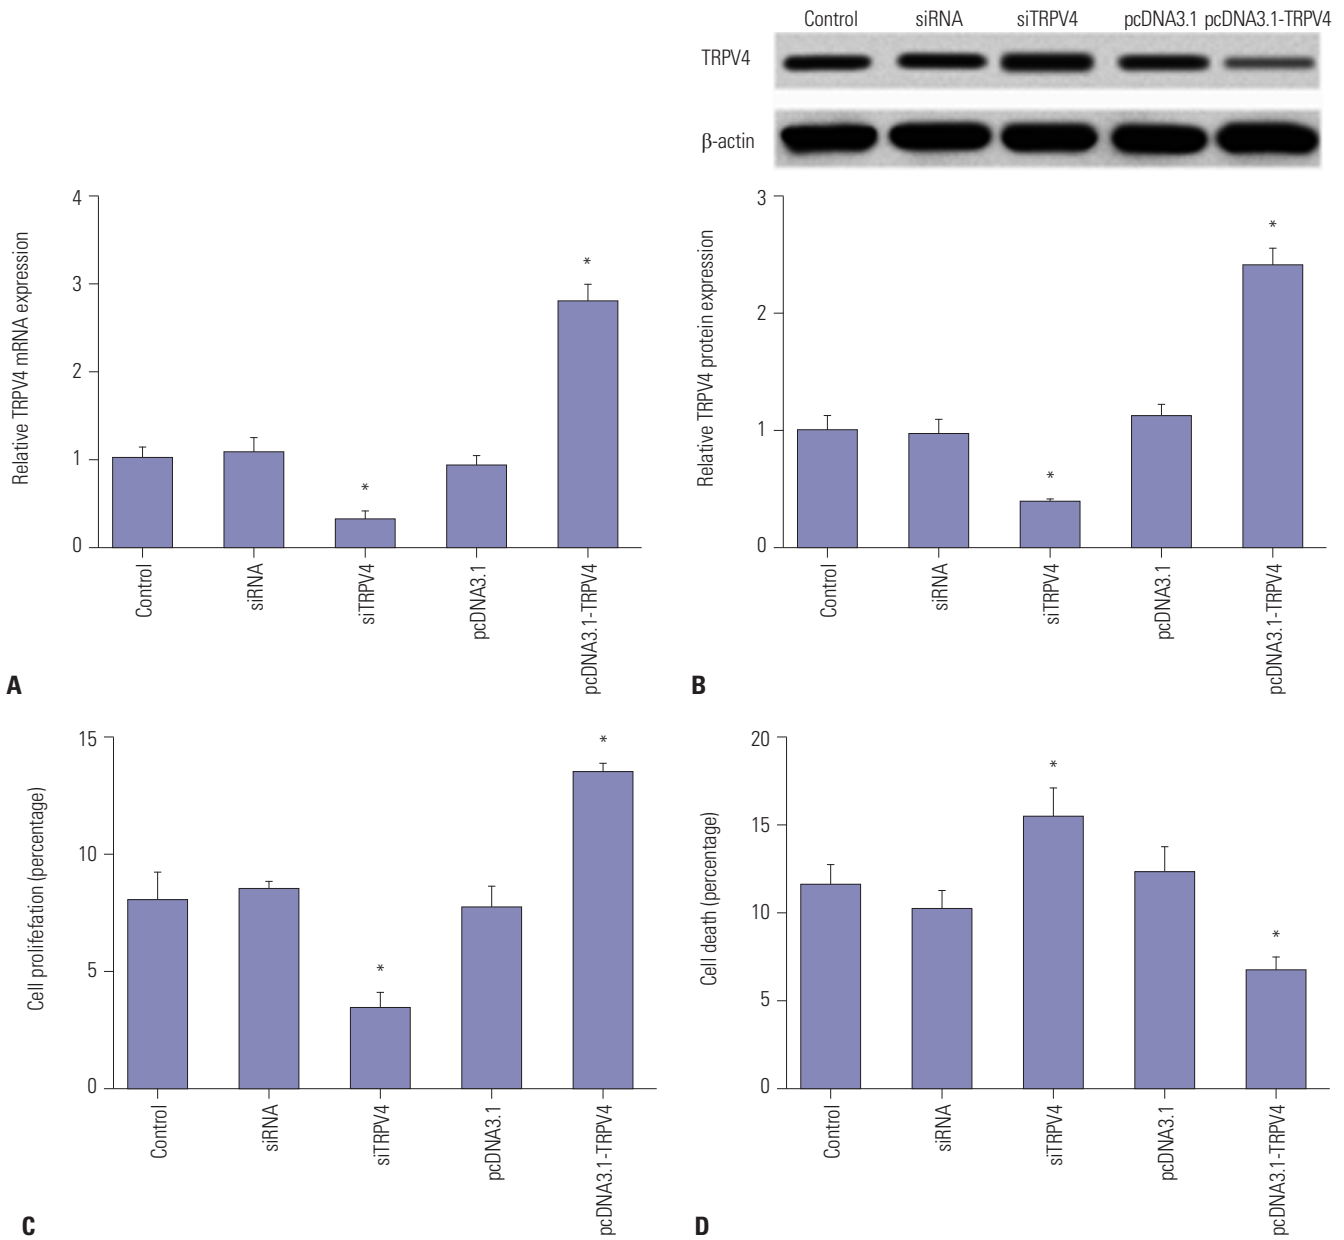

**Supplementary Fig. 1.** TRPV4 involved in HG-induced HEI-OC1 cell proliferation and apoptosis. (A) The relative expression of TRPV4 mRNA in HG cultured HEI-OC1 cells after transfection with pcDNA3.1 empty vector, pcDNA3.1-TRPV4 vector, TRPV4-siRNA, or scrambled siRNA control was determined by qRT-PCR. (B) Western blotting was used to analyze the expression of TRPV4 protein. (C) The effect of TRPV4 on cell proliferation of HEI-OC1 cells was detected using the MTT assay. (D) The effect of TRPV4 on cell apoptosis of HEI-OC1 cells was detected using the cell death detection ELISA-Plus apoptosis assay. Data are representative of three experiments. \*Indicates differences from controls at  $p < 0.05$ . TRPV4, transient receptor potential vanilloid sub type 4; HG, high glucose.
